# Supplementary material
Source: publisher site journal article supplement (https://www.dovepress.com/article/344990)
Supplement: Supplementary file 1 [file get_supplementary_file.php]

**Supplementary materials
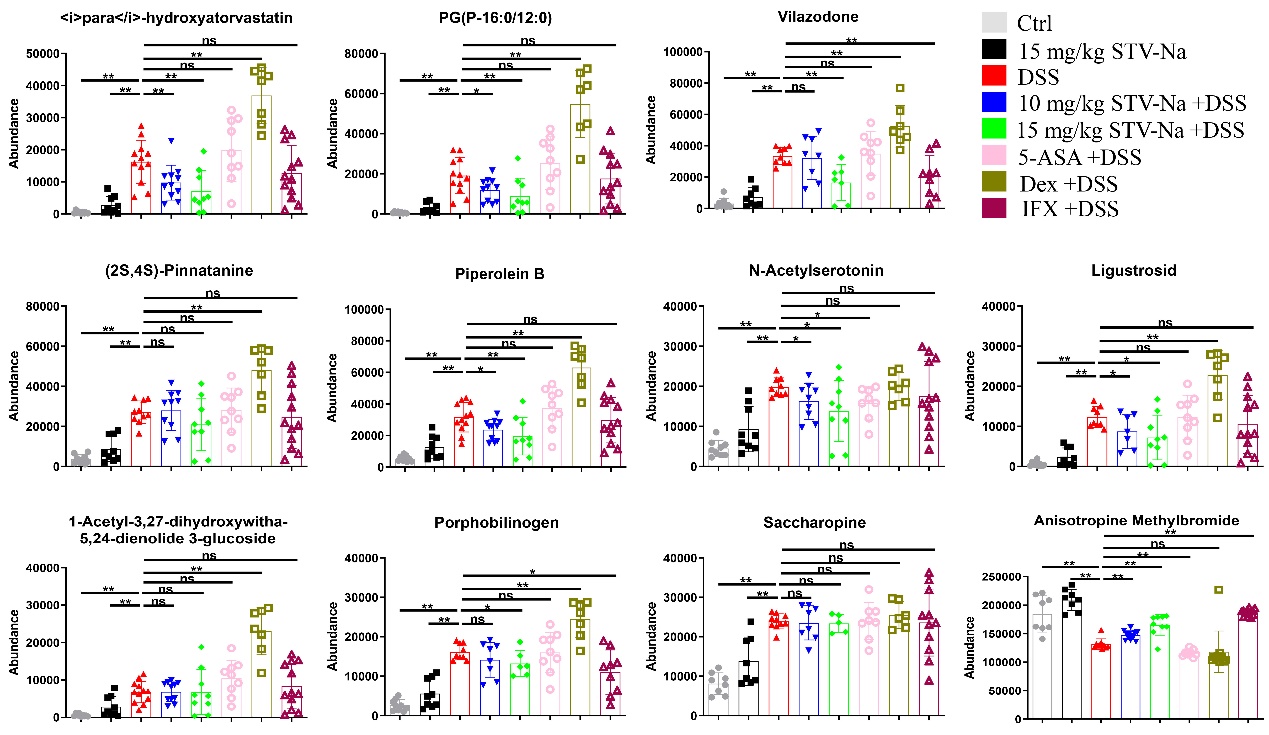
**

**
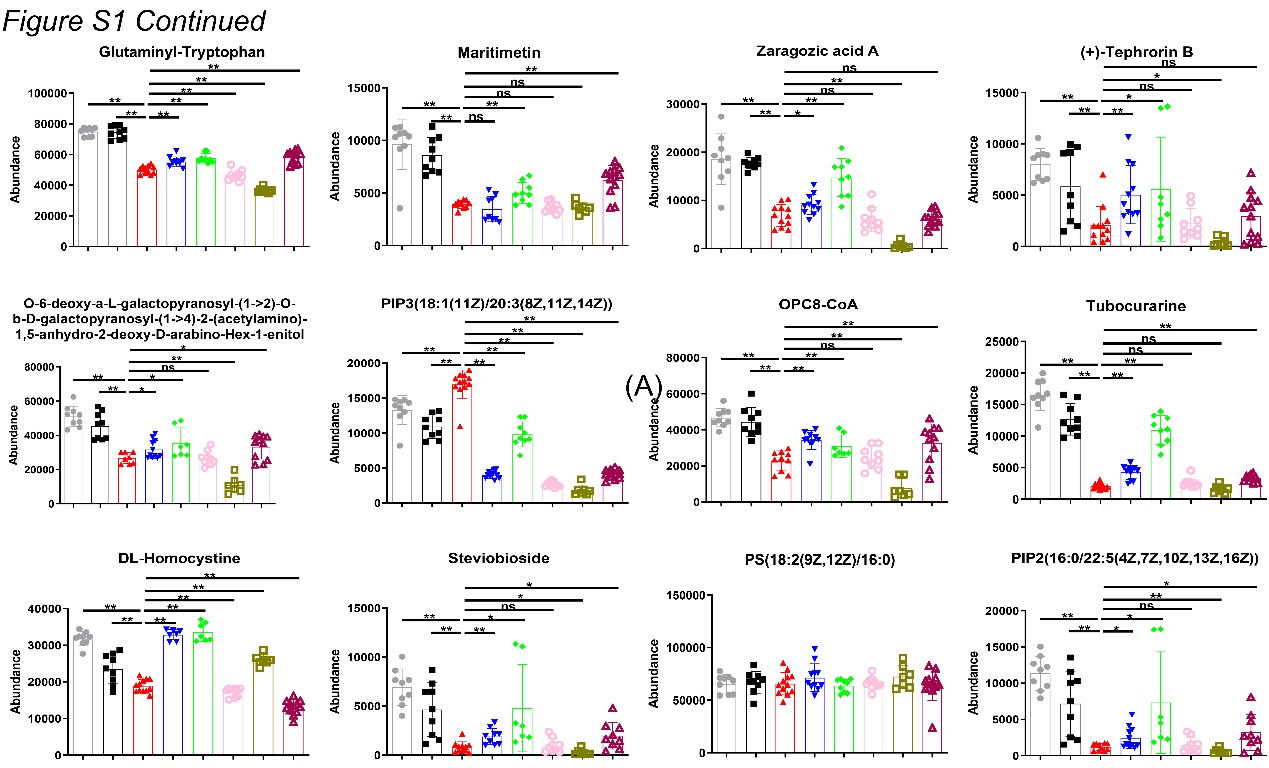
**

**Supplementary Figure S1** STV-Na significantly affects metabolites in mice with colitis. Data is published in terms of means ± SDs. The statistical analyses were performed with Student’s t-test or one-way ANOVA followed Turkey’s post hoc test (n = 6 to 12 mice per group; each data point represents one mouse); *****P < 0.05 and ******P < 0.01 in contrast to the DSS group; ns, not significant.


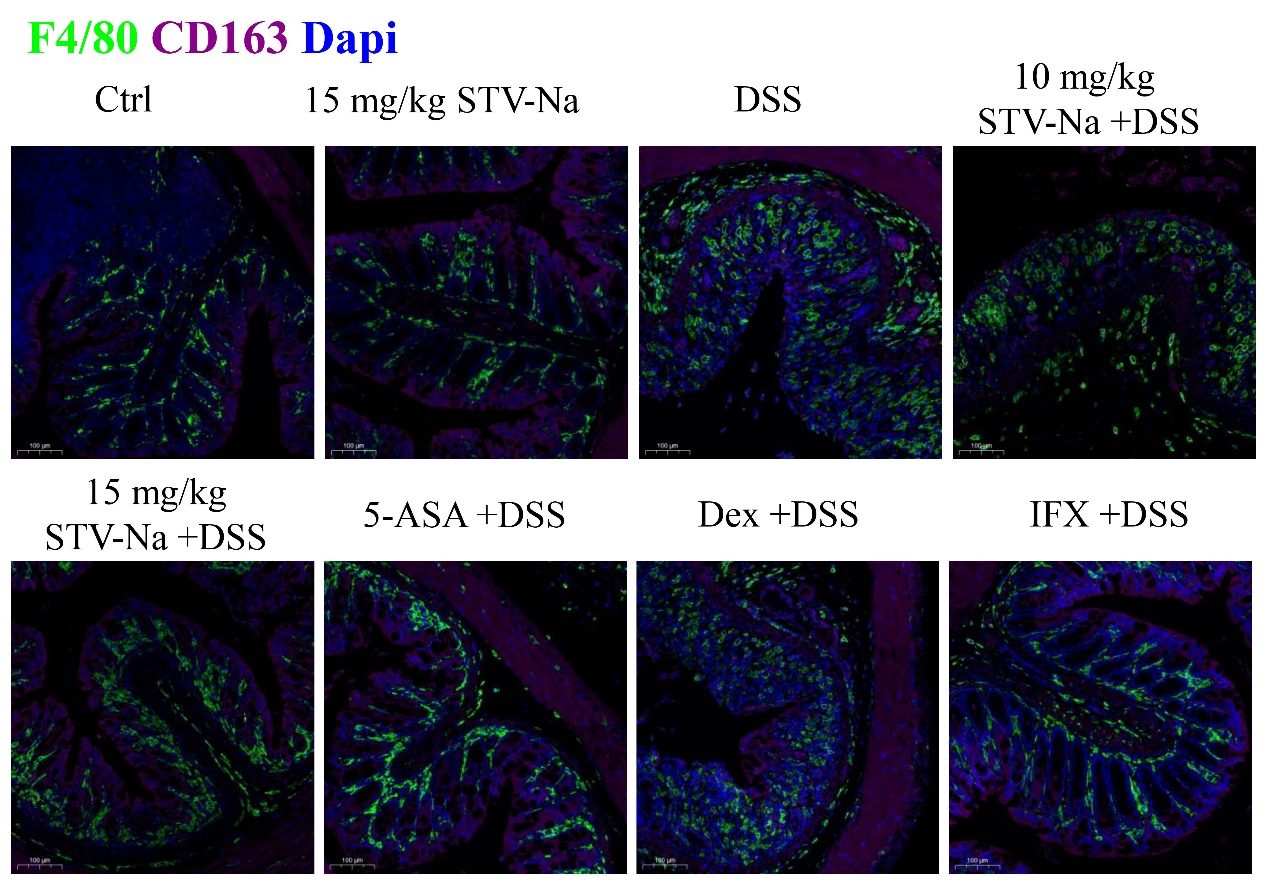


**Supplementary Figure S2** Effect of STV-Na on F4/80+CD163+ M2 macrophages in the colons of mice with IBDs. Immunofluorescence staining images representing F4/80 (macrophage marker, green), CD163 (M2 macrophages marker, red), and Dapi (nuclei, blue).


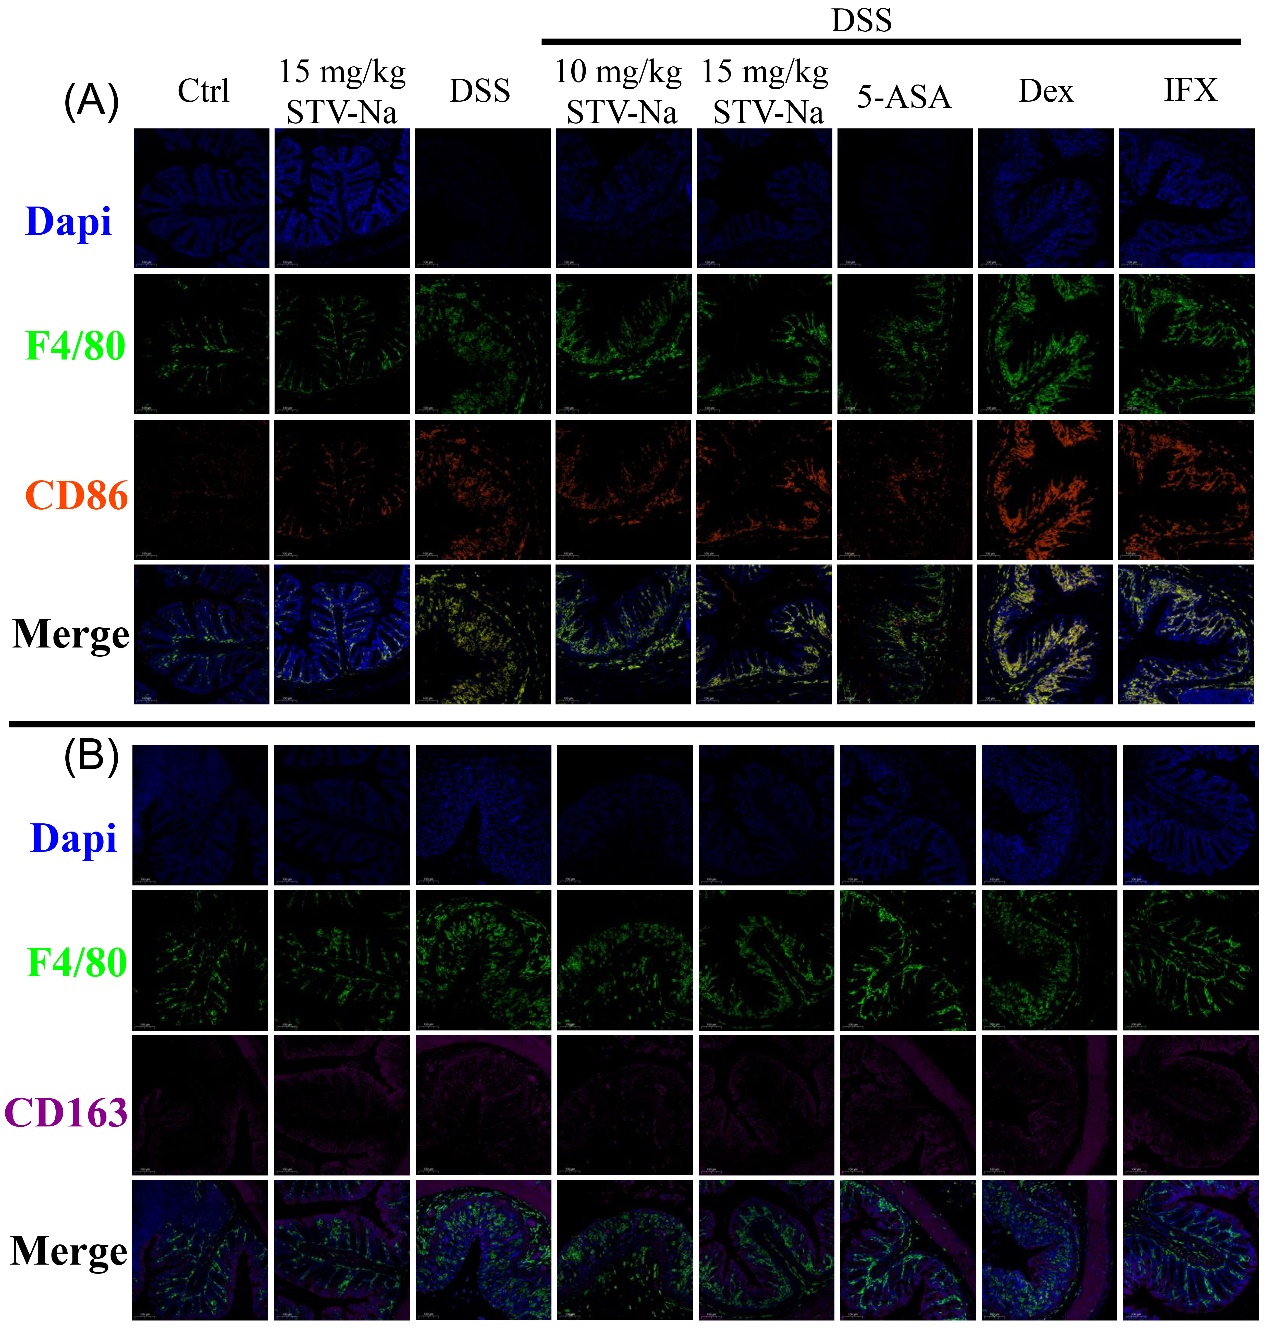


**Supplementary Figure S3** Effect of STV-Na on F4/80+CD86+ M1 macrophages and F4/80+CD163+ M2 macrophages in the colons of mice with IBDs. Macrophages were visualized using immunofluorescence microscopy in the colons of mice with IBDs in different groups. (**A**) From top to bottom: Dapi (nuclei, blue), F4/80 (macrophage marker, green), CD86 (marker of M1 macrophage and inflamed tissue, orange-red), and merged image. (**B**) Dapi (nuclei, blue), F4/80 (macrophage marker, green), CD163 (M2 macrophage marker, red), and merged image. Scale bars: 100 µm.


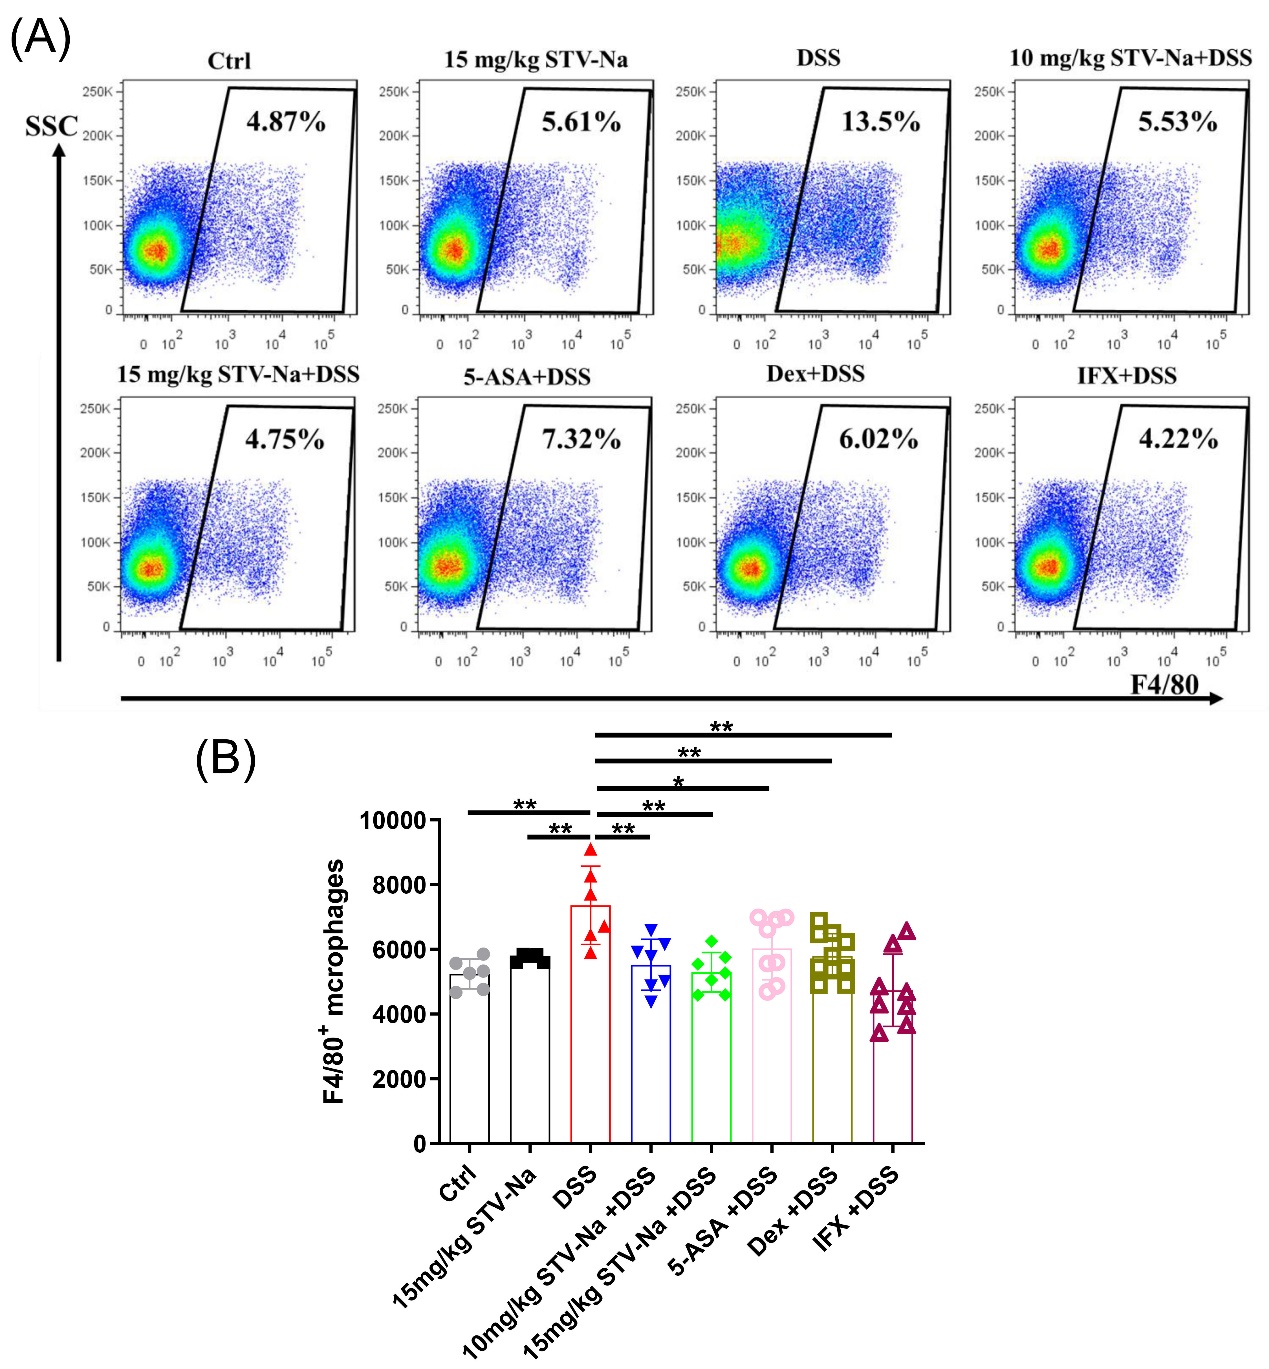


**Supplementary Figure S4** STV-Na suppresses F4/80+ macrophages in the spleen. (**A**) Representative flow cytometric dot plots of F4/80 macrophages from each group. Scale bars, 100 µm. (**B**) Counts of macrophages in the spleen. Data is published in terms of means ± SDs. The statistical analyses were performed with Student’s t-test or one-way ANOVA followed Turkey’s post hoc test (n = 6 to 10 mice per group; each data point represents one mouse); *****P < 0.05 and ******P < 0.01 in contrast to the DSS group.


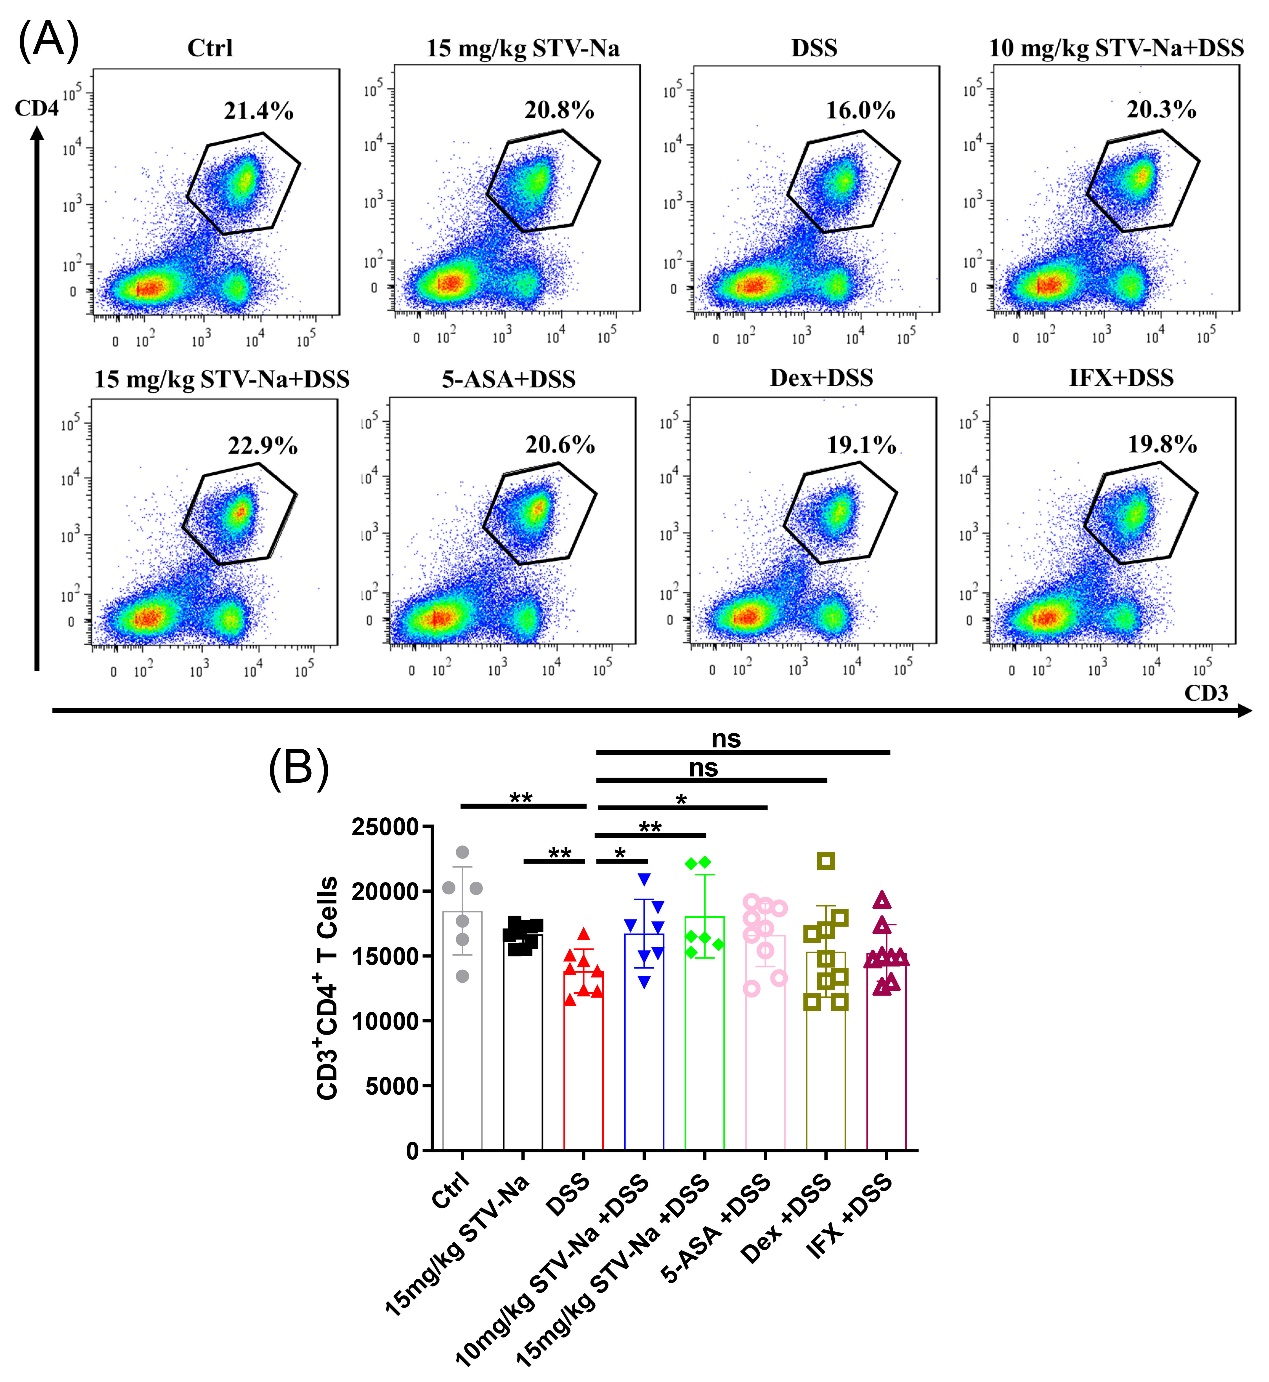


**Supplementary Figure S5** STV-Na suppresses CD3+CD4+ T cells in the spleen. (**A**) Representative flow cytometric dot plots of CD3+CD4+ T cells from each group. (**B**) Counts of CD3+CD4+ T cells in the spleen. Data are published in terms of means ± SDs. The statistical analyses were performed with Student’s t-test or one-way ANOVA followed Turkey’s post hoc test (n = 6 to 9 mice per group; each data point represents one mouse); *****P < 0.05 and ******P < 0.01 in contrast to the DSS group; ns, not significant.

**Supplementary Tables**

**Supplementary Table S1** Sequences of used in the RT- qPCR assay.

| **Gene** | **Species** | **Primer sequences (5****´-3´)** |
| --- | --- | --- |
| TNF-α | Mouse | Forward ATGAGCACAGAAAGCATGA  Reverse AGTAGACAGAAGAGCGTGGT |
| IFN-γ | Mouse | Forward GAACTGGCAAAAGGATGGTGA  Reverse TGTGGGTTGTTGACCTCAAAC |
| IL-1β | Mouse | Forward AATGAAAGACGGCACACCCA  Reverse TGCTTGTGAGGTGCTGATGT |
| IL-4 | Mouse | Forward GGTCTCAACCCCCAGCTAGT  Reverse CCGATGATCTCTCTCAAGTGAT |
| IL-17A | Mouse | Forward TCTCCACCGCAATGAAGACC  Reverse CACACCCACCAGCATCTTCT |
| ZO-1 | Mouse | Forward GGGGCCTACACTGATCAAGA  Reverse TGGAGATGAGGCTTCTGCTT |
| Claudin-1 | Mouse | Forward ACGGTCCTCCTGGCTCAGTT  Reverse GATAAGCGAACCTTGGCGGC |
| Occludin | Mouse | Forward GCTTATCTTGGGAGCCTGGACA  Reverse GTCATTGCTTGGTGCATAATGATTG |
| MUC2 | Mouse | Forward GATAGGTGGCAGACAGGAGA  Reverse GCTGACGAGTGGTTGGTGAATG |
| Reg3γ | Mouse | Forward ATGCTTCCCCGTATAACCATCA  Reverse GGCCATATCTGCATCATACCAG |
| Rpl32 | Mouse | Forward GCTGCCATCTGTTTTACGG  Reverse TGACTGGTGCCTGATGAACT |

**Supplementary Table S2** Histopathological grading system for colonic sections.

| **Feature graded** | **Grade** | **Description** |
| --- | --- | --- |
| Inflammation | 0 | Normal |
| 1 | Minimal infiltration of the lamina propria, focal to multifocal |
| 2 | Mild infiltration of the lamina propria, multifocal, mild gland separation |
| 3 | Moderate to mixed infiltration, multifocal with minimal edema |
| 4 | Marked mixed infiltration into the submucosa and lamina propria with extensive areas of gland separation, enlarged Peyers patches, edema |
| Epithelium | 0 | Normal |
| 1 | Minimal: focal mucosal hyperplasia |
| 2 | Mild: multifocal tufting of rafts of epithelial cells with increased numbers of goblet cells |
| 3 | Moderate: extensive locally extensive to multifocal erosion or epithelial attenuation |
| 4 | Marked: locally extensive mucosal ulceration |
| Glands | 0 | Normal |
| 1 | Minimal: rare gland dilatation |
| 2 | Mild: multifocal gland dilatation |
| 3 | Moderate: multifocal gland dilatation with abscessation and occasional loss of glands |
| 4 | Marked: locally extensive to subtotal loss of glands |
| Depth of lesion | 0 | None |
| 1 | Mucosa |
| 2 | Mucosa and submucosa |
| 3 | Transmural |
| Extent of section  affected | 0 | None |
| 1 | Minimal: < 10% |
| 2 | Mild: 10-25% |
| 3 | Moderate: 26-50% |
| 4 | Marked: > 50% |

**Supplementary Table S3** Plasma metabolites after STV-Na pretreatment of mice with colitis.

| **NO** | **RT (min)a** | **m/z** | **Mode** | **Biomarker identification** | **Formula** | **Trend b** | **Trend c** | **Related pathway** |
| --- | --- | --- | --- | --- | --- | --- | --- | --- |
| 1 | 2.79 | 573.2387 | d N | <i>para</i>-hydroxyatorvastatin | C30H38O11 | ↑** | ↓** |  |
| 2 | 4.62 | 685.4258 | N | PG(P-16:0/12:0) | C21H29NO3 | ↑** | ↓** |  |
| 3 | 3.43 | 440.2125 | N | Vilazodone | C26H27N5O2 | ↑** | ↓* |  |
| 4 | 2.73 | 279.0740 | P | (2S,4S)-Pinnatanine | C25H32O12 | ↑** | - |  |
| 5 | 4.62 | 342.2090 | P | Piperolein B | C21H29NO3 | ↑** | ↓** |  |
| 6 | 1.58 | 217.1001 | N | N-Acetylserotonin | C12H14N2O2 | ↑** | ↓* | Tryptophan metabolism |
| 7 | 2.73 | 559.1557 | N | Ligustroside | C25H32O12 | ↑** | ↓* |  |
| 8 | 4.44 | 697.3310 | N | 1-Acetyl-3,27-dihydroxywitha-5,24-dienolide 3-glucoside | C36H54O11 | ↑** | - |  |
| 9 | 2.73 | 261.0650 | N | Porphobilinogen | C10H14N2O4 | ↑** | ↓* | Porphyrin and chlorophyll metabolism |
| 10 | 2.86 | 293.0885 | N | Saccharopine | C11H18N2O5 | ↑** | - | Lysine degradation |
| 11 | 3.89 | 377.1491 | N | Glutaminyl-Tryptophan | C17H32BrNO2 | ↓** | - |  |
| 12 | 7.16 | 321.0152 | N | Maritimetin | C15H11ClO6 | ↓** | ↑** |  |
| 13 | 5.28 | 735.2813 | N | Zaragozic acid A | C35H46O14 | ↓** | ↑** |  |
| 14 | 3.31 | 519.1625 | N | (+)-Tephrorin B | C30H28O6 | ↓** | ↑* |  |
| 15 | 3.47 | 556.1922 | N | O-6-deoxy-a-L-galactopyranosyl-(1->2)-O-b-D-galactopyranosyl-(1->4)-2-(acetylamino)-1,5-anhydro-2-deoxy-D-arabino-Hex-1-enitol | C20H33NO14 | ↓** | ↑** |  |
| 16 | 3.75 | 1161.4148 | N | PIP3(18:1(11Z)/20:3(8Z,11Z,14Z)) | C47H86O22P4 | ↑** | ↓** |  |
| 17 | 4.55 | 1042.3217 | N | OPC8-CoA | C39H64N7O18P35 | ↓** | ↑** |  |
| 18 | 4.03 | 654.2949 | N | Tubocurarine | C37H41N2O6P | ↓** | ↑** |  |
| 19 | 0.75 | 267.0497 | N | DL-Homocystine | C8H16N2O4S2 | ↓** | ↑** |  |
| 20 | 3.56 | 641.3176 | N | Steviobioside | C32H50O13 | ↓** | ↑* |  |
| 21 | 17.92 | 804.5035 | N | PS(18:2(9Z,12Z)/16:0) | C40H74NO10P | ↓** | - | glycerophospholipid metabolism |
| 22 | 4.97 | 1079.4332 | N | PIP2(16:0/22:5(4Z,7Z,10Z,13Z,16Z)) | C47H83O19P3 | ↓** | ↑* | glycerophospholipid metabolism |
| 23 | 3.89 | 379.1967 | P | Anisotropine Methylbromide | C16H20N4O4 | ↓** | ↑** |  |

a RT: retention time of the components; b ↑ indicates that the metabolites were upregulated in the model group in contrast to the control group; c ↓ indicates that the metabolites were downregulated in the STV group compared with the model group; d P and N represent ESI (+) and ESI (-), respectively. ****** indicates a very significant change (p < 0.01), and ***** indicates a significant change (p < 0.05).
